# Supplementary material for: LIDAR-based characterization and conservation of the first theropod dinosaur trackways from Arkansas, USA
Source: PLOS journal article supplement (doi:10.1371/journal.pone.0190527), 2018-01-02

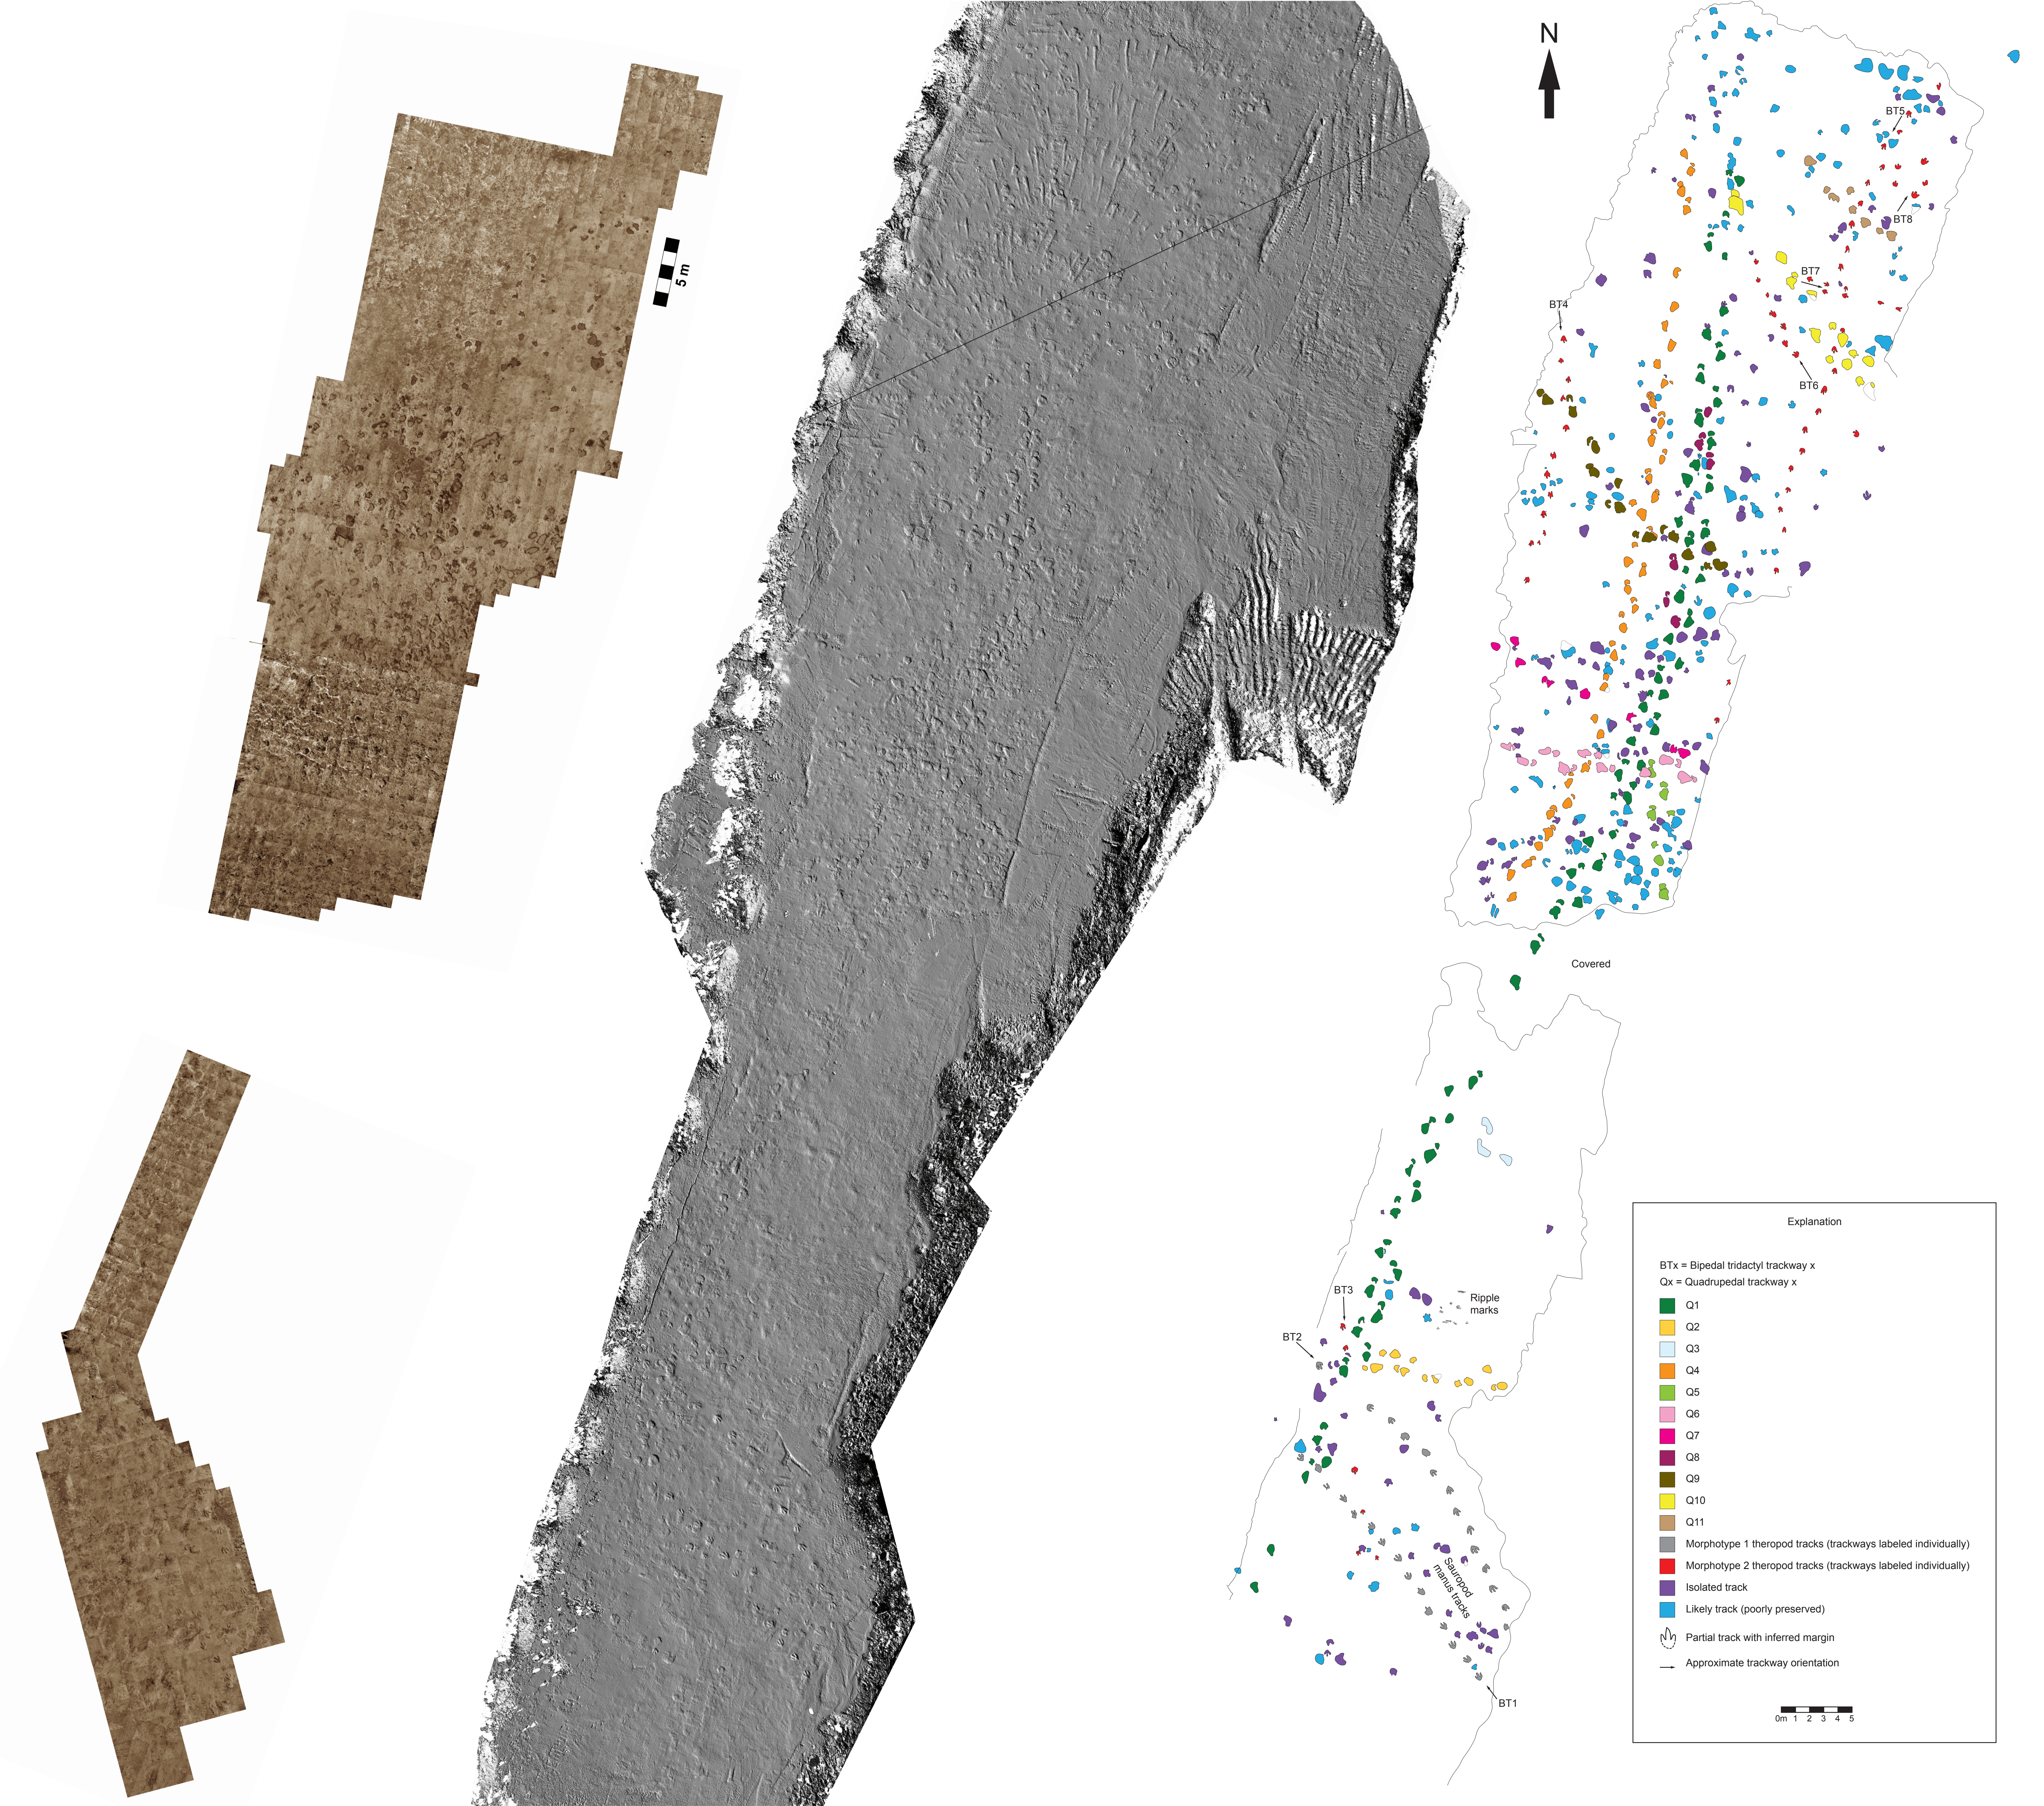

Supplement: S1 (10.1371/journal.pone.0190527.s001) [file journal.pone.0190527.s001]
