# Supplementary material for: LIDAR-based characterization and conservation of the first theropod dinosaur trackways from Arkansas, USA
Source: PLoS One. 2018 Jan 2;13(1):e0190527. doi: 10.1371/journal.pone.0190527 (PMC5749850; doi:10.1371/journal.pone.0190527)
Supplement: S2 Table — See Fig 2 for additional explanation. (XLSX) [file pone.0190527.s003.xlsx]

## Sheet: L vs W
Name	Visibility	Type	Value	Value without units	Length (m)	Width (m)
BT1-1FLT	No	Distance	0.512 m	0.512
BT1-1FWT	No	Distance	0.437 m	0.437
BT1-2 FWT	No	Distance	0.419 m	0.419
BT1-2 FLT	No	Distance	0.485 m	0.485
BT1-3 FLT	No	Distance	0.442 m	0.442
BT1-3 FWT	No	Distance	0.410 m	0.41
BT1-4 FLT	No	Distance	0.463 m	0.463
BT1-4 FWT	No	Distance	0.332 m	0.332
BT1-5 FWT	No	Distance	0.435 m	0.435
BT1-5 FLT	No	Distance	0.470 m	0.47
BT1-7 FWT	No	Distance	0.446 m	0.446
BT1-7 FLT	No	Distance	0.467 m	0.467
BT1-8 FLT	No	Distance	0.460 m	0.46
BT1-8 FWT	No	Distance	0.414 m	0.414
BT1-9 FWT	No	Distance	0.423 m	0.423
BT1-9 FLT	No	Distance	0.509 m	0.509
BT1-10 FLT	No	Distance	0.510 m	0.51
BT1-10 FWT	No	Distance	0.404 m	0.404
BT1-11 FLT	No	Distance	0.514 m	0.514
BT1-11 FWT	No	Distance	0.426 m	0.426
BT1-12 FWT	No	Distance	0.394 m	0.394
BT1-12 FLT	No	Distance	0.491 m	0.491
BT1-13 FLT	No	Distance	0.681 m	0.681
BT1-13 FWT	No	Distance	0.562 m	0.562
BT1-15 FWT	No	Distance	0.427 m	0.427
BT1-15 FLT	No	Distance	0.497 m	0.497
BT2-1 FWT	No	Distance	0.465 m	0.465
BT2-1 FLT	No	Distance	0.484 m	0.484
BT2-4 FLT	No	Distance	0.530 m	0.53
BT2-4 FWT	No	Distance	0.451 m	0.451
BT2-5 FLT	No	Distance	0.498 m	0.498
BT2-5 FWT	No	Distance	0.420 m	0.42
BT2-6 FLT	No	Distance	0.568 m	0.568
BT2-6 FWT	No	Distance	0.416 m	0.416
BT2-8 FLT	No	Distance	0.497 m	0.497
BT2-8 FWT	No	Distance	0.453 m	0.453
BT2-9 FLT	No	Distance	0.602 m	0.602
BT2-9 FWT	No	Distance	0.508 m	0.508
BT2-10 FWT	No	Distance	0.430 m	0.43
BT2-10 FLT	No	Distance	0.514 m	0.514
BT2-11 FLT	No	Distance	0.558 m	0.558
BT2-11 FWT	No	Distance	0.437 m	0.437
BT2-12 FWT	No	Distance	0.468 m	0.468
BT2-12 FLT	No	Distance	0.500 m	0.5
BT2-13 FWT	No	Distance	0.447 m	0.447
BT2-13 FLT	No	Distance	0.608 m	0.608
BT2-14 FLT	No	Distance	0.506 m	0.506
BT2-14 FWT	No	Distance	0.481 m	0.481
BT2-15 FLT	No	Distance	0.613 m	0.613
BT2-15 FWT	No	Distance	0.514 m	0.514
BT3-1 FLT	No	Distance	0.579 m	0.579
BT3-1 FWT	No	Distance	0.430 m	0.43
BT3-2 FLT	No	Distance	0.340 m	0.34
BT3-2 FWT	No	Distance	0.319 m	0.319
BT3-3 FLT	No	Distance	0.346 m	0.346
BT3-3 FWT	No	Distance	0.308 m	0.308
BT4-1 FLT	No	Distance	0.513 m	0.513
BT4-1 FWT	No	Distance	0.380 m	0.38
BT4-3 FLT	No	Distance	0.482 m	0.482
BT4-3 FWT	No	Distance	0.382 m	0.382
BT4-4 FLT	No	Distance	0.438 m	0.438
BT4-4 FWT	No	Distance	0.348 m	0.348
BT4-7 FLT	No	Distance	0.401 m	0.401
BT4-7 FLT	No	Distance	0.426 m	0.426
BT4-8 FWT	No	Distance	0.368 m	0.368
BT4-8 FLT	No	Distance	0.494 m	0.494
BT4-9 FWT	No	Distance	0.332 m	0.332
BT4-9 FLT	No	Distance	0.466 m	0.466
BT4-10 FWT	No	Distance	0.418 m	0.418
BT4-10 FLT	No	Distance	0.485 m	0.485
BT4-12A FLT	No	Distance	0.383 m	0.383
BT4-12A FWT	No	Distance	0.306 m	0.306
BT4-12B FWT	No	Distance	0.331 m	0.331
BT4-12B FLT	No	Distance	0.321 m	0.321
BT4-LEFT FWT	No	Distance	0.401 m	0.401
BT4-LEFT FLT	No	Distance	0.455 m	0.455
BT4-LEFT WBIV	No	Distance	0.149 m	0.149
BT4-LEFT WBIII	No	Distance	0.123 m	0.123
BT4-LEFT WBII	No	Distance	0.080 m	0.08
BT4-LEFT R	No	Distance	0.245 m	0.245
BT4-LEFT BLIV	No	Distance	0.136 m	0.136
BT4-LEFT BLIII	No	Distance	0.203 m	0.203
BT4-LEFT BLII	No	Distance	0.135 m	0.135
BT4-LEFT WMIV	No	Distance	0.107 m	0.107
BT4-LEFT WMIII	No	Distance	0.138 m	0.138
BT4-LEFT WMII	No	Distance	0.057 m	0.057
BT4-LEFT M	No	Distance	0.256 m	0.256
BT4-LEFT K	No	Distance	0.256 m	0.256
BT5-1 FWA	No	Distance	0.428 m	0.428
BT5-1 FWT	No	Distance	0.379 m	0.379
BT5-1 FLA	No	Distance	0.487 m	0.487
BT5-1 FLT	No	Distance	0.455 m	0.455
BT5-1 WBII	No	Distance	0.100 m	0.1
BT5-1 WBIII	No	Distance	0.126 m	0.126
BT5-1 WBIV	No	Distance	0.091 m	0.091
BT5-1 R	No	Distance	0.177 m	0.177
BT5-1 BLII	No	Distance	0.186 m	0.186
BT5-1 BLIII	No	Distance	0.280 m	0.28
BT5-1 BLIV	No	Distance	0.101 m	0.101
BT5-1 WMII	No	Distance	0.077 m	0.077
BT5-1 WMIII	No	Distance	0.086 m	0.086
BT5-1 WMIV	No	Distance	0.070 m	0.07
BT5-1 K	No	Distance	0.184 m	0.184
BT5-1 M	No	Distance	0.190 m	0.19
BT5-3 FWA	No	Distance	0.429 m	0.429
BT5-3 FWT	No	Distance	0.369 m	0.369
BT5-3 FLA	No	Distance	0.492 m	0.492
BT5-3 FLT	No	Distance	0.462 m	0.462
BT5-3 WBII	No	Distance	0.080 m	0.08
BT5-3 WBIII	No	Distance	0.130 m	0.13
BT5-3 WBIV	No	Distance	0.098 m	0.098
BT5-3 R	No	Distance	0.190 m	0.19
BT5-3 BLII	No	Distance	0.184 m	0.184
BT5-3 BLIII	No	Distance	0.279 m	0.279
BT5-3 BLIV	No	Distance	0.150 m	0.15
BT5-3 WMII	No	Distance	0.085 m	0.085
BT5-3 WMIII	No	Distance	0.099 m	0.099
BT5-3 WMIV	No	Distance	0.076 m	0.076
BT5-3 K	No	Distance	0.205 m	0.205
BT5-3 M	No	Distance	0.186 m	0.186
BT5-4 FLA	No	Distance	0.517 m	0.517
BT5-4 FLT	No	Distance	0.506 m	0.506
BT5-4 FWA	No	Distance	0.374 m	0.374
BT5-4 FWT	No	Distance	0.358 m	0.358
BT5-4 WBIV	No	Distance	0.108 m	0.108
BT5-4 WBIII	No	Distance	0.123 m	0.123
BT5-4 WBII	No	Distance	0.084 m	0.084
BT5-4 R	No	Distance	0.223 m	0.223
BT5-4 BLIV	No	Distance	0.135 m	0.135
BT5-4 BLIII	No	Distance	0.285 m	0.285
BT5-4 BLII	No	Distance	0.191 m	0.191
BT5-4 WMIV	No	Distance	0.074 m	0.074
BT5-4 WMIII	No	Distance	0.103 m	0.103
BT5-4 WMII	No	Distance	0.078 m	0.078
BT5-4 M	No	Distance	0.236 m	0.236
BT5-4 K	No	Distance	0.232 m	0.232
BT5-5 FWA	No	Distance	0.344 m	0.344
BT5-5 FWT	No	Distance	0.328 m	0.328
BT5-5 FLA	No	Distance	0.546 m	0.546
BT5-5 FLT	No	Distance	0.510 m	0.51
BT5-5 WBII	No	Distance	0.090 m	0.09
BT5-5 WBIII	No	Distance	0.116 m	0.116
BT5-5 WBIV	No	Distance	0.083 m	0.083
BT5-5 R	No	Distance	0.187 m	0.187
BT5-5 BLII	No	Distance	0.183 m	0.183
BT5-5 BLIII	No	Distance	0.326 m	0.326
BT5-5 BLIV	No	Distance	0.166 m	0.166
BT5-5 WMII	No	Distance	0.085 m	0.085
BT5-5 WMIII	No	Distance	0.102 m	0.102
BT5-5 WMIV	No	Distance	0.070 m	0.07
BT5-5 K	No	Distance	0.200 m	0.2
BT5-5 M	No	Distance	0.195 m	0.195
BT5-6 FLA	No	Distance	0.578 m	0.578
BT5-6 FLT	No	Distance	0.461 m	0.461
BT5-6 FWA	No	Distance	0.352 m	0.352
BT5-6 FWT	No	Distance	0.334 m	0.334
BT5-6 WBIV	No	Distance	0.094 m	0.094
BT5-6 WBIII	No	Distance	0.105 m	0.105
BT5-6 WBII	No	Distance	0.105 m	0.105
BT5-6 R	No	Distance	0.174 m	0.174
BT5-6 BLIV	No	Distance	0.125 m	0.125
BT5-6 BLIII	No	Distance	0.291 m	0.291
BT5-6 BLII	No	Distance	0.175 m	0.175
BT5-6 WMIV	No	Distance	0.088 m	0.088
BT5-6 WMIII	No	Distance	0.109 m	0.109
BT5-6 WMII	No	Distance	0.088 m	0.088
BT5-6 M	No	Distance	0.288 m	0.288
BT5-6 K	No	Distance	0.294 m	0.294
BT5-7 FWA	No	Distance	0.422 m	0.422
BT5-7 FWT	No	Distance	0.383 m	0.383
BT5-7 FLA	No	Distance	0.558 m	0.558
BT5-7 FLT	No	Distance	0.494 m	0.494
BT5-7 WBII	No	Distance	0.120 m	0.12
BT5-7 WBIII	No	Distance	0.144 m	0.144
BT5-7 WBIV	No	Distance	0.117 m	0.117
BT5-7 R	No	Distance	0.279 m	0.279
BT5-7 BLII	No	Distance	0.104 m	0.104
BT5-7 BLIII	No	Distance	0.226 m	0.226
BT5-7 BLIV	No	Distance	0.110 m	0.11
BT5-7 WMII	No	Distance	0.096 m	0.096
BT5-7 WMIII	No	Distance	0.086 m	0.086
BT5-7 WMIV	No	Distance	0.095 m	0.095
BT5-7 K	No	Distance	0.284 m	0.284
BT5-7 M	No	Distance	0.287 m	0.287
BT5-8 FWA	No	Distance	0.412 m	0.412
BT5-8 FWT	No	Distance	0.375 m	0.375
BT5-8 FLA	No	Distance	0.474 m	0.474
BT5-8 FLT	No	Distance	0.440 m	0.44
BT5-8 WBIV	No	Distance	0.081 m	0.081
BT5-8 WBIII	No	Distance	0.112 m	0.112
BT5-8 WBII	No	Distance	0.082 m	0.082
BT5-8 R	No	Distance	0.185 m	0.185
BT5-8 BLIV	No	Distance	0.112 m	0.112
BT5-8 BLIII	No	Distance	0.260 m	0.26
BT5-8 BLII	No	Distance	0.181 m	0.181
BT5-8 WMIV	No	Distance	0.056 m	0.056
BT5-8 WMIII	No	Distance	0.093 m	0.093
BT5-8 WMII	No	Distance	0.058 m	0.058
BT5-8 M	No	Distance	0.230 m	0.23
BT5-8 K	No	Distance	0.176 m	0.176
BT5-9 FWA	No	Distance	0.438 m	0.438
BT5-9 FWT	No	Distance	0.400 m	0.4
BT5-9 FLA	No	Distance	0.545 m	0.545
BT5-9 FLT	No	Distance	0.506 m	0.506
BT5-9 WBII	No	Distance	0.089 m	0.089
BT5-9 WBIII	No	Distance	0.111 m	0.111
BT5-9 WBIV	No	Distance	0.108 m	0.108
BT5-9 R	No	Distance	0.242 m	0.242
BT5-9 BLII	No	Distance	0.164 m	0.164
BT5-9 BLIII	No	Distance	0.264 m	0.264
BT5-9 BLIV	No	Distance	0.183 m	0.183
BT5-9 WMII	No	Distance	0.060 m	0.06
BT5-9 WMIII	No	Distance	0.075 m	0.075
BT5-9 WMIV	No	Distance	0.049 m	0.049
BT5-9 K	No	Distance	0.247 m	0.247
BT5-9 M	No	Distance	0.247 m	0.247
BT5-10 FLA	No	Distance	0.393 m	0.393
BT5-10 FLT	No	Distance	0.393 m	0.393
BT5-10 FWA	No	Distance	0.426 m	0.426
BT5-10 FWT	No	Distance	0.355 m	0.355
BT5-10 WBIV	No	Distance	0.105 m	0.105
BT5-10 WBIII	No	Distance	0.112 m	0.112
BT5-10 WBII	No	Distance	0.084 m	0.084
BT5-10 R	No	Distance	0.126 m	0.126
BT5-10 BLIV	No	Distance	0.127 m	0.127
BT5-10 BLIII	No	Distance	0.267 m	0.267
BT5-10 BLII	No	Distance	0.132 m	0.132
BT5-10 WMIV	No	Distance	0.090 m	0.09
BT5-10 WMIII	No	Distance	0.083 m	0.083
BT5-10 WMII	No	Distance	0.068 m	0.068
BT5-10 M	No	Distance	0.148 m	0.148
BT5-10 K	No	Distance	0.122 m	0.122
BT5-12 FLA	No	Distance	0.422 m	0.422
BT5-12 FLT	No	Distance	0.411 m	0.411
BT5-12 FWA	No	Distance	0.303 m	0.303
BT5-12 FWT	No	Distance	0.300 m	0.3
BT5-12 WBIV	No	Distance	0.071 m	0.071
BT5-12 WBIII	No	Distance	0.094 m	0.094
BT5-12 WBII	No	Distance	0.085 m	0.085
BT5-12 R	No	Distance	0.133 m	0.133
BT5-12 BLIV	No	Distance	0.100 m	0.1
BT5-12 BLIII	No	Distance	0.273 m	0.273
BT5-12 BLII	No	Distance	0.193 m	0.193
BT5-12 WMIV	No	Distance	0.076 m	0.076
BT5-12 WMIII	No	Distance	0.095 m	0.095
BT5-12 WMII	No	Distance	0.086 m	0.086
BT5-12 M	No	Distance	0.150 m	0.15
BT5-12 K	No	Distance	0.144 m	0.144
BT5-13 FLA	No	Distance	0.530 m	0.53
BT5-13 FLT	No	Distance	0.496 m	0.496
BT5-13 FWA	No	Distance	0.394 m	0.394
BT5-13 FWT	No	Distance	0.376 m	0.376
BT5-13 WBII	No	Distance	0.122 m	0.122
BT5-13 WBIII	No	Distance	0.112 m	0.112
BT5-13 WBIV	No	Distance	0.100 m	0.1
BT5-13 R	No	Distance	0.209 m	0.209
BT5-13 BLII	No	Distance	0.177 m	0.177
BT5-13 BLIII	No	Distance	0.290 m	0.29
BT5-13 BLIV	No	Distance	0.195 m	0.195
BT5-13 WMII	No	Distance	0.097 m	0.097
BT5-13 WMIII	No	Distance	0.091 m	0.091
BT5-13 WMII	No	Distance	0.083 m	0.083
BT5-13 K	No	Distance	0.222 m	0.222
BT5-13 M	No	Distance	0.212 m	0.212
BT5-14 FWA	No	Distance	0.420 m	0.42
BT5-14 FWT	No	Distance	0.394 m	0.394
BT5-14 FLA	No	Distance	0.571 m	0.571
BT5-14 FLT	No	Distance	0.508 m	0.508
BT5-14 WBIV	No	Distance	0.111 m	0.111
BT5-14 WBIII	No	Distance	0.122 m	0.122
BT5-14 WBII	No	Distance	0.106 m	0.106
BT5-14 R	No	Distance	0.225 m	0.225
BT5-14 BLIV	No	Distance	0.164 m	0.164
BT5-14 BLIII	No	Distance	0.278 m	0.278
BT5-14 BLII	No	Distance	0.199 m	0.199
BT5-14 WMIV	No	Distance	0.112 m	0.112
BT5-14 WMIII	No	Distance	0.083 m	0.083
BT5-14 WMII	No	Distance	0.078 m	0.078
BT5-14 M	No	Distance	0.253 m	0.253
BT5-14 K	No	Distance	0.228 m	0.228
BT5-15 FLA	No	Distance	0.582 m	0.582
BT5-15 FLT	No	Distance	0.567 m	0.567
BT5-15 FWA	No	Distance	0.434 m	0.434
BT5-15 FWT	No	Distance	0.380 m	0.38
BT5-15 WBII	No	Distance	0.136 m	0.136
BT5-15 WBIII	No	Distance	0.118 m	0.118
BT5-15 WBIV	No	Distance	0.116 m	0.116
BT5-15 R	No	Distance	0.303 m	0.303
BT5-15 BLII	No	Distance	0.114 m	0.114
BT5-15 BLIII	No	Distance	0.262 m	0.262
BT5-15 BLIV	No	Distance	0.201 m	0.201
BT5-15 WMII	No	Distance	0.093 m	0.093
BT5-15 WMIII	No	Distance	0.083 m	0.083
BT5-15 WMIV	No	Distance	0.093 m	0.093
BT5-15 K	No	Distance	0.325 m	0.325
BT5-15 M	No	Distance	0.303 m	0.303
BT5-16 FWA	No	Distance	0.387 m	0.387
BT5-16 FWT	No	Distance	0.368 m	0.368
BT5-16 FLA	No	Distance	0.543 m	0.543
BT5-16 FLT	No	Distance	0.508 m	0.508
BT5-16 WBIV	No	Distance	0.123 m	0.123
BT5-16 WBIII	No	Distance	0.108 m	0.108
BT5-16 WBII	No	Distance	0.093 m	0.093
BT5-16 R	No	Distance	0.221 m	0.221
BT5-16 BLIV	No	Distance	0.196 m	0.196
BT5-16 BLIII	No	Distance	0.286 m	0.286
BT5-16 BLII	No	Distance	0.218 m	0.218
BT5-16 WMIV	No	Distance	0.078 m	0.078
BT5-16 WMIII	No	Distance	0.100 m	0.1
BT5-16 WMII	No	Distance	0.081 m	0.081
BT5-16 M	No	Distance	0.243 m	0.243
BT5-16 K	No	Distance	0.212 m	0.212
BT5-17 FWA	No	Distance	0.409 m	0.409
BT5-17 FWT	No	Distance	0.392 m	0.392
BT5-17 FLA	No	Distance	0.521 m	0.521
BT5-17 FLT	No	Distance	0.496 m	0.496
BT5-17 WBII	No	Distance	0.086 m	0.086
BT5-17 WBIII	No	Distance	0.106 m	0.106
BT5-17 WBIV	No	Distance	0.095 m	0.095
BT5-17 R	No	Distance	0.147 m	0.147
BT5-17 BLII	No	Distance	0.237 m	0.237
BT5-17 BLIII	No	Distance	0.350 m	0.35
BT5-17 BLIV	No	Distance	0.213 m	0.213
BT5-17 WMII	No	Distance	0.092 m	0.092
BT5-17 WMIII	No	Distance	0.103 m	0.103
BT5-17 WMIV	No	Distance	0.094 m	0.094
BT5-17 K	No	Distance	0.160 m	0.16
BT5-17 M	No	Distance	0.162 m	0.162
BT5-18 FWA	No	Distance	0.433 m	0.433
BT5-18 FWT	No	Distance	0.412 m	0.412
BT5-18 FLA	No	Distance	0.530 m	0.53
BT5-18 FLT	No	Distance	0.462 m	0.462
BT5-18 WBIV	No	Distance	0.136 m	0.136
BT5-18 WBIII	No	Distance	0.133 m	0.133
BT5-18 WBII	No	Distance	0.084 m	0.084
BT5-18 R	No	Distance	0.188 m	0.188
BT5-18 BLIV	No	Distance	0.192 m	0.192
BT5-18 BLIII	No	Distance	0.266 m	0.266
BT5-18 BLII	No	Distance	0.244 m	0.244
BT5-18 WMIV	No	Distance	0.105 m	0.105
BT5-18 WMIII	No	Distance	0.101 m	0.101
BT5-18 WMII	No	Distance	0.061 m	0.061
BT5-18 M	No	Distance	0.213 m	0.213
BT5-18 K	No	Distance	0.208 m	0.208
BT5-19 FLA	No	Distance	0.490 m	0.49
BT5-19 FLT	No	Distance	0.461 m	0.461
BT5-19 FWA	No	Distance	0.361 m	0.361
BT5-19 FWT	No	Distance	0.348 m	0.348
BT5-19 WBII	No	Distance	0.103 m	0.103
BT5-19 WBIII	No	Distance	0.129 m	0.129
BT5-19 WBIV	No	Distance	0.067 m	0.067
BT5-19 R	No	Distance	0.152 m	0.152
BT5-19 BLII	No	Distance	0.177 m	0.177
BT5-19 BLIII	No	Distance	0.303 m	0.303
BT5-19 BLIV	No	Distance	0.199 m	0.199
BT5-19 WMII	No	Distance	0.088 m	0.088
BT5-19 WMIII	No	Distance	0.087 m	0.087
BT5-19 WMIV	No	Distance	0.071 m	0.071
BT5-19 K	No	Distance	0.171 m	0.171
BT5-19 M	No	Distance	0.164 m	0.164
BT5-20 FWA	No	Distance	0.364 m	0.364
BT5-20 FWT	No	Distance	0.349 m	0.349
BT5-20 FLA	No	Distance	0.442 m	0.442
BT5-20 FLT	No	Distance	0.400 m	0.4
BT5-20 WBIV	No	Distance	0.113 m	0.113
BT5-20 WBIII	No	Distance	0.125 m	0.125
BT5-20 WBII	No	Distance	0.077 m	0.077
BT5-20 R	No	Distance	0.091 m	0.091
BT5-20 BLIV	No	Distance	0.145 m	0.145
BT5-20 BLIII	No	Distance	0.305 m	0.305
BT5-20 BLII	No	Distance	0.180 m	0.18
BT5-20 WMIV	No	Distance	0.096 m	0.096
BT5-20 WMIII	No	Distance	0.099 m	0.099
BT5-20 WMII	No	Distance	0.060 m	0.06
BT5-20 M	No	Distance	0.134 m	0.134
BT5-20 K	No	Distance	0.095 m	0.095
BT5-21 FLA	No	Distance	0.421 m	0.421
BT5-21 FLT	No	Distance	0.408 m	0.408
BT5-21 FWA	No	Distance	0.352 m	0.352
BT5-21 FWT	No	Distance	0.339 m	0.339
BT5-21 WBII	No	Distance	0.100 m	0.1
BT5-21 WBIII	No	Distance	0.113 m	0.113
BT5-21 WBIV	No	Distance	0.127 m	0.127
BT5-21 BLII	No	Distance	0.184 m	0.184
BT5-21 BLIII	No	Distance	0.241 m	0.241
BT5-21 BLIV	No	Distance	0.152 m	0.152
BT5-21 R	No	Distance	0.168 m	0.168
BT5-21 WMII	No	Distance	0.092 m	0.092
BT5-21 WMIII	No	Distance	0.090 m	0.09
BT5-21 WMIV	No	Distance	0.080 m	0.08
BT5-21 K	No	Distance	0.177 m	0.177
BT5-21 M	No	Distance	0.170 m	0.17
BT5-30 FWA	No	Distance	0.408 m	0.408
BT5-30 FWT	No	Distance	0.381 m	0.381
BT5-30 FLA	No	Distance	0.524 m	0.524
BT5-30 FLT	No	Distance	0.481 m	0.481
BT5-30 WBIV	No	Distance	0.093 m	0.093
BT5-30 WBIII	No	Distance	0.098 m	0.098
BT5-30 WBII	No	Distance	0.088 m	0.088
BT5-30 R	No	Distance	0.203 m	0.203
BT5-30 BLIV	No	Distance	0.153 m	0.153
BT5-30 BLIII	No	Distance	0.279 m	0.279
BT5-30 BLII	No	Distance	0.190 m	0.19
BT5-30 WMIV	No	Distance	0.069 m	0.069
BT5-30 WMIII	No	Distance	0.086 m	0.086
BT5-30 WMII	No	Distance	0.062 m	0.062
BT5-30 M	No	Distance	0.222 m	0.222
BT5-30 K	No	Distance	0.203 m	0.203
BT5-32 FLA	No	Distance	0.449 m	0.449
BT5-32 FLT	No	Distance	0.436 m	0.436
BT5-32 FWA	No	Distance	0.371 m	0.371
BT5-32 FWT	No	Distance	0.345 m	0.345
BT5-32 WBIV	No	Distance	0.094 m	0.094
BT5-32 WBIII	No	Distance	0.107 m	0.107
BT5-32 WBII	No	Distance	0.116 m	0.116
BT5-32 R	No	Distance	0.135 m	0.135
BT5-32 BLIV	No	Distance	0.161 m	0.161
BT5-32 BLIII	No	Distance	0.297 m	0.297
BT5-32 BLII	No	Distance	0.166 m	0.166
BT5-32 WMIV	No	Distance	0.071 m	0.071
BT5-32 WMIII	No	Distance	0.074 m	0.074
BT5-32 WMII	No	Distance	0.081 m	0.081
BT5-32 M	No	Distance	0.152 m	0.152
BT5-32 K	No	Distance	0.155 m	0.155
BT6-1 FLA	No	Distance	0.482 m	0.482
BT6-1 FLT	No	Distance	0.401 m	0.401
BT6-1 FWA	No	Distance	0.476 m	0.476
BT6-1 FWT	No	Distance	0.386 m	0.386
BT6-1 WBII	No	Distance	0.081 m	0.081
BT6-1 WBIII	No	Distance	0.120 m	0.12
BT6-1 WBIV	No	Distance	0.100 m	0.1
BT6-1 R	No	Distance	0.135 m	0.135
BT6-1 BLII	No	Distance	0.228 m	0.228
BT6-1 BLIII	No	Distance	0.269 m	0.269
BT6-1 BLIV	No	Distance	0.124 m	0.124
BT6-1 WMII	No	Distance	0.092 m	0.092
BT6-1 WMIII	No	Distance	0.090 m	0.09
BT6-1 WMIV	No	Distance	0.086 m	0.086
BT6-1 K	No	Distance	0.129 m	0.129
BT6-1 M	No	Distance	0.178 m	0.178
BT6-2 FLA	No	Distance	0.570 m	0.57
BT6-2 FLT	No	Distance	0.492 m	0.492
BT6-2 FWA	No	Distance	0.517 m	0.517
BT6-2 FWT	No	Distance	0.414 m	0.414
BT6-2 WBIV	No	Distance	0.134 m	0.134
BT6-2 WBIII	No	Distance	0.107 m	0.107
BT6-2 WBII	No	Distance	0.077 m	0.077
BT6-2 R	No	Distance	0.263 m	0.263
BT6-2 BLIV	No	Distance	0.154 m	0.154
BT6-2 BLIII	No	Distance	0.215 m	0.215
BT6-2 BLII	No	Distance	0.179 m	0.179
BT6-2 WMIV	No	Distance	0.093 m	0.093
BT6-2 WMIII	No	Distance	0.080 m	0.08
BT6-2 WMII	No	Distance	0.066 m	0.066
BT6-2 M	No	Distance	0.285 m	0.285
BT6-2 K	No	Distance	0.285 m	0.285
BT6-3 FWA	No	Distance	0.477 m	0.477
BT6-3 FWT	No	Distance	0.398 m	0.398
BT6-3 FLA	No	Distance	0.548 m	0.548
BT6-3 FLT	No	Distance	0.442 m	0.442
BT6-3 WBII	No	Distance	0.089 m	0.089
BT6-3 WBIII	No	Distance	0.100 m	0.1
BT6-3 WBIV	No	Distance	0.106 m	0.106
BT6-3 R	No	Distance	0.243 m	0.243
BT6-3 BLII	No	Distance	0.166 m	0.166
BT6-3 BLIII	No	Distance	0.205 m	0.205
BT6-3 BLIV	No	Distance	0.161 m	0.161
BT6-3 WMII	No	Distance	0.054 m	0.054
BT6-3 WMIII	No	Distance	0.073 m	0.073
BT6-3 WMIV	No	Distance	0.091 m	0.091
BT6-3 K	No	Distance	0.248 m	0.248
BT6-3 M	No	Distance	0.261 m	0.261
BT6-4 FWA	No	Distance	0.464 m	0.464
BT6-4 FWT	No	Distance	0.355 m	0.355
BT6-4 FLA	No	Distance	0.583 m	0.583
BT6-4 FLT	No	Distance	0.458 m	0.458
BT6-4 WBIV	No	Distance	0.101 m	0.101
BT6-4 WBIII	No	Distance	0.082 m	0.082
BT6-4 WBII	No	Distance	0.125 m	0.125
BT6-4 R	No	Distance	0.289 m	0.289
BT6-4 BLIV	No	Distance	0.170 m	0.17
BT6-4 BLIII	No	Distance	0.180 m	0.18
BT6-4 BLII	No	Distance	0.086 m	0.086
BT6-4 WMIV	No	Distance	0.138 m	0.138
BT6-4 WMIII	No	Distance	0.081 m	0.081
BT6-4 WMII	No	Distance	0.063 m	0.063
BT6-4 M	No	Distance	0.288 m	0.288
BT6-4 K	No	Distance	0.291 m	0.291
BT6-6 FLA	No	Distance	0.418 m	0.418
BT6-6 FLT	No	Distance	0.315 m	0.315
BT6-6 FWA	No	Distance	0.364 m	0.364
BT6-6 FWT	No	Distance	0.282 m	0.282
BT6-6 WBIV	No	Distance	0.084 m	0.084
BT6-6 WBIII	No	Distance	0.132 m	0.132
BT6-6 WBII	No	Distance	0.080 m	0.08
BT6-6 R	No	Distance	0.150 m	0.15
BT6-6 BLIV	No	Distance	0.083 m	0.083
BT6-6 BLIII	No	Distance	0.168 m	0.168
BT6-6 BLII	No	Distance	0.071 m	0.071
BT6-6 WMIV	No	Distance	0.044 m	0.044
BT6-6 WMIII	No	Distance	0.041 m	0.041
BT6-6 WMII	No	Distance	0.053 m	0.053
BT6-6 M	No	Distance	0.151 m	0.151
BT6-6 K	No	Distance	0.173 m	0.173
BT7-1 FLA	No	Distance	0.453 m	0.453
BT7-1 FLT	No	Distance	0.356 m	0.356
BT7-1 FWA	No	Distance	0.400 m	0.4
BT7-1 FWT	No	Distance	0.334 m	0.334
BT7-1 WBIV	No	Distance	0.097 m	0.097
BT7-1 WBIII	No	Distance	0.120 m	0.12
BT7-1 WBII	No	Distance	0.092 m	0.092
BT7-1 R	No	Distance	0.195 m	0.195
BT7-1 BLIV	No	Distance	0.061 m	0.061
BT7-1 BLIII	No	Distance	0.164 m	0.164
BT7-1 BLII	No	Distance	0.160 m	0.16
BT7-1 WMIV	No	Distance	0.062 m	0.062
BT7-1 WMIII	No	Distance	0.057 m	0.057
BT7-1 WMII	No	Distance	0.045 m	0.045
BT7-1 M	No	Distance	0.207 m	0.207
BT7-1 K	No	Distance	0.186 m	0.186
BT7-2 FWA	No	Distance	0.371 m	0.371
BT7-2 FWT	No	Distance	0.317 m	0.317
BT7-2 FLA	No	Distance	0.469 m	0.469
BT7-2 FLT	No	Distance	0.389 m	0.389
BT7-2 WBII	No	Distance	0.102 m	0.102
BT7-2 WBIII	No	Distance	0.110 m	0.11
BT7-2 WBIV	No	Distance	0.098 m	0.098
BT7-2 R	No	Distance	0.177 m	0.177
BT7-2 BLII	No	Distance	0.123 m	0.123
BT7-2 BLIII	No	Distance	0.210 m	0.21
BT7-2 BLIV	No	Distance	0.168 m	0.168
BT7-2 WMII	No	Distance	0.074 m	0.074
BT7-2 WMIII	No	Distance	0.092 m	0.092
BT7-2 WMIV	No	Distance	0.080 m	0.08
BT7-2 K	No	Distance	0.188 m	0.188
BT7-2 M	No	Distance	0.187 m	0.187
BT7-3 FLA	No	Distance	0.429 m	0.429
BT7-3 FLT	No	Distance	0.399 m	0.399
BT7-3 FWA	No	Distance	0.382 m	0.382
BT7-3 FWT	No	Distance	0.330 m	0.33
BT7-3 WBIV	No	Distance	0.088 m	0.088
BT7-3 WBIII	No	Distance	0.102 m	0.102
BT7-3 WBII	No	Distance	0.111 m	0.111
BT7-3 R	No	Distance	0.163 m	0.163
BT7-3 BLIV	No	Distance	0.149 m	0.149
BT7-3 BLIII	No	Distance	0.235 m	0.235
BT7-3 BLII	No	Distance	0.139 m	0.139
BT7-3 WMIV	No	Distance	0.084 m	0.084
BT7-3 WMIII	No	Distance	0.071 m	0.071
BT7-3 WMII	No	Distance	0.084 m	0.084
BT7-3 M	No	Distance	0.163 m	0.163
BT7-3 K	No	Distance	0.175 m	0.175
BT7-6 FLA	No	Distance	0.472 m	0.472
BT7-6 FLT	No	Distance	0.405 m	0.405
BT7-6 FLA	No	Distance	0.404 m	0.404
BT7-6 FLT	No	Distance	0.356 m	0.356
BT7-6 WBII	No	Distance	0.109 m	0.109
BT7-6 WBIII	No	Distance	0.094 m	0.094
BT7-6 WBIV	No	Distance	0.132 m	0.132
BT7-6 R	No	Distance	0.232 m	0.232
BT7-6 BLII	No	Distance	0.110 m	0.11
BT7-6 BLIII	No	Distance	0.172 m	0.172
BT7-6 BLIV	No	Distance	0.119 m	0.119
BT7-6 WMII	No	Distance	0.078 m	0.078
BT7-6 WMIII	No	Distance	0.062 m	0.062
BT7-6 WMIV	No	Distance	0.069 m	0.069
BT7-6 K	No	Distance	0.232 m	0.232
BT7-6 M	No	Distance	0.228 m	0.228
BT8-1 FLA	Yes	Distance	0.453 m	0.453
BT8-1 FLT	Yes	Distance	0.435 m	0.435
BT8-1 FWA	Yes	Distance	0.436 m	0.436
BT8-1 FWT	Yes	Distance	0.402 m	0.402
BT8-1 WBII	Yes	Distance	0.158 m	0.158
BT8-1 WBIII	Yes	Distance	0.092 m	0.092
BT8-1 WBIV	Yes	Distance	0.108 m	0.108
BT8-1 R	No	Distance	0.187 m	0.187
BT8-1 BLII	Yes	Distance	0.160 m	0.16
BT8-1 BLIII	Yes	Distance	0.244 m	0.244
BT8-1 BLIV	Yes	Distance	0.170 m	0.17
BT8-1 WMII	Yes	Distance	0.097 m	0.097
BT8-1 WMIII	Yes	Distance	0.111 m	0.111
BT8-1 WMIV	Yes	Distance	0.105 m	0.105
BT8-1 K	Yes	Distance	0.197 m	0.197
BT8-1 M	Yes	Distance	0.218 m	0.218
BT8-2 FLA	Yes	Distance	0.501 m	0.501
BT8-2 FLT	Yes	Distance	0.450 m	0.45
BT8-2 FWA	Yes	Distance	0.370 m	0.37
BT8-2 FWT	Yes	Distance	0.351 m	0.351
BT8-2 WBIV	Yes	Distance	0.109 m	0.109
BT8-2 WBIII	Yes	Distance	0.112 m	0.112
BT8-2 WBII	Yes	Distance	0.116 m	0.116
BT8-2 R	No	Distance	0.231 m	0.231
BT8-2 BLIV	Yes	Distance	0.176 m	0.176
BT8-2 BLIII	Yes	Distance	0.214 m	0.214
BT8-2 BLII	Yes	Distance	0.132 m	0.132
BT8-2 WMIV	Yes	Distance	0.088 m	0.088
BT8-2 WMIII	Yes	Distance	0.093 m	0.093
BT8-2 WMII	Yes	Distance	0.086 m	0.086
BT8-2 M	Yes	Distance	0.243 m	0.243
BT8-2 K	Yes	Distance	0.237 m	0.237
BT8-8 FLA	Yes	Distance	0.552 m	0.552
BT8-8 FLT	Yes	Distance	0.547 m	0.547
BT8-8 FWA	Yes	Distance	0.536 m	0.536
BT8-8 FWT	Yes	Distance	0.513 m	0.513
BT8-8 WBIV	Yes	Distance	0.151 m	0.151
BT8-8 WBIII	Yes	Distance	0.135 m	0.135
BT8-8 WBII	Yes	Distance	0.143 m	0.143
BT8-8 R	No	Distance	0.231 m	0.231
BT8-8 BLIV	Yes	Distance	0.193 m	0.193
BT8-8 BLIII	Yes	Distance	0.316 m	0.316
BT8-8 BLII	Yes	Distance	0.273 m	0.273
BT8-8 WMIV	Yes	Distance	0.111 m	0.111
BT8-8 WMIII	Yes	Distance	0.131 m	0.131
BT8-8 WMII	Yes	Distance	0.126 m	0.126
BT8-8M	Yes	Distance	0.241 m	0.241
BT8-8 K	Yes	Distance	0.244 m	0.244

## Sheet: S2 Table. Tridactyl track data
S2 Table. Tridactyl track measurements					FLA = apparent foot length; FLT = true foot length; FWA = apparent foot width; FWT = true foot width
Trackway	Morphotype	Track number	Measurement	Value (cm)
BT1	1	1	FLA	62.8
BT1	1	1	FLT	54.7
BT1	1	1	FWA	51.2
BT1	1	1	FWT	43.7
BT1	1	2	FLA	62.7
BT1	1	2	FLT	48.5
BT1	1	2	FWA	53.1
BT1	1	2	FWT	41.9
BT1	1	3	FLA	60.9
BT1	1	3	FLT	44.2
BT1	1	3	FWA	53.1
BT1	1	3	FWT	41
BT1	1	4	FLA	61.3
BT1	1	4	FLT	46.3
BT1	1	4	FWA	48.1
BT1	1	4	FWT	33.2
BT1	1	5	FLA	67.7
BT1	1	5	FLT	47
BT1	1	5	FWA	57
BT1	1	5	FWT	43.5
BT1	1	7	FLA	61.1
BT1	1	7	FLT	46.7
BT1	1	7	FWA	51.8
BT1	1	7	FWT	44.6
BT1	1	8	FLA	63.4
BT1	1	8	FLT	46
BT1	1	8	FWA	54.9
BT1	1	8	FWT	41.4
BT1	1	9	FLA	65.9
BT1	1	9	FLT	50.9
BT1	1	9	FWA	59.2
BT1	1	9	FWT	42.3
BT1	1	10	FLA	62.5
BT1	1	10	FLT	51
BT1	1	10	FWA	50.8
BT1	1	10	FWT	40.4
BT1	1	11	FLA	60.1
BT1	1	11	FLT	51.4
BT1	1	11	FWA	47.1
BT1	1	11	FWT	42.6
BT1	1	12	FLA	57.8
BT1	1	12	FLT	49.1
BT1	1	12	FWA	47.7
BT1	1	12	FWT	39.4
BT1	1	13	FLA	76.8
BT1	1	13	FLT	68.1
BT1	1	13	FWA	67.7
BT1	1	13	FWT	56.2
BT1	1	15	FLA	56.4
BT1	1	15	FLT	49.7
BT1	1	15	FWA	46.3
BT1	1	15	FWT	42.7
BT2	1	1	FLA	55.5
BT2	1	1	FLT	48.4
BT2	1	1	FWA	52.1
BT2	1	1	FWT	46.5
BT2	1	4	FLA	57.7
BT2	1	4	FLT	53
BT2	1	4	FWA	59.5
BT2	1	4	FWT	45.1
BT2	1	5	FLA	60.4
BT2	1	5	FLT	49.8
BT2	1	5	FWA	45.6
BT2	1	5	FWT	42
BT2	1	6	FLA	65.4
BT2	1	6	FLT	56.8
BT2	1	6	FWA	57.8
BT2	1	6	FWT	41.6
BT2	1	8	FLA	55.4
BT2	1	8	FLT	49.7
BT2	1	8	FWA	51.6
BT2	1	8	FWT	45.3
BT2	1	9	FLA	65.5
BT2	1	9	FLT	60.2
BT2	1	9	FWA	54.7
BT2	1	9	FWT	50.8
BT2	1	10	FLA	63.9
BT2	1	10	FLT	51.4
BT2	1	10	FWA	51.9
BT2	1	10	FWT	43
BT2	1	11	FLA	61.9
BT2	1	11	FLT	55.8
BT2	1	11	FWA	47.5
BT2	1	11	FWT	43.7
BT2	1	12	FLA	59.8
BT2	1	12	FLT	50
BT2	1	12	FWA	55.1
BT2	1	12	FWT	46.8
BT2	1	13	FLA	66.2
BT2	1	13	FLT	60.8
BT2	1	13	FWA	51.5
BT2	1	13	FWT	44.7
BT2	1	14	FLA	56.2
BT2	1	14	FLT	50.6
BT2	1	14	FWA	59.2
BT2	1	14	FWT	48.1
BT2	1	15	FLA	68
BT2	1	15	FLT	61.3
BT2	1	15	FWA	54.3
BT2	1	15	FWT	51.4
BT3	2	1	FLA	71
BT3	2	1	FLT	57.9
BT3	2	1	FWA	46.8
BT3	2	1	FWT	43
BT3	2	2	FLA	41.2
BT3	2	2	FLT	34
BT3	2	2	FWA	34.7
BT3	2	2	FWT	31.9
BT3	2	3	FLA	37
BT3	2	3	FLT	34.6
BT3	2	3	FWA	32.3
BT3	2	3	FWT	30.8
BT4	2	1	FLA	53.9
BT4	2	1	FLT	51.3
BT4	2	1	FWA	43.5
BT4	2	1	FWT	38
BT4	2	2	FLA	39.4
BT4	2	2	FWA	36.1
BT4	2	3	FLA	51.7
BT4	2	3	FLT	48.2
BT4	2	3	FWA	42.8
BT4	2	3	FWT	38.2
BT4	2	4	FLA	58.5
BT4	2	4	FLT	43.8
BT4	2	4	FWA	41.1
BT4	2	4	FWT	34.8
BT4	2	7	BT4-7 FLA	45.8
BT4	2	7	BT4-7 FLT	42.6
BT4	2	7	BT4-7 FWA	45.4
BT4	2	7	BT4-7 FWT	40.1
BT4	2	8	FLA	57.8
BT4	2	8	FLT	49.4
BT4	2	8	FWA	41.6
BT4	2	8	FWT	36.8
BT4	2	9	FLA	50.7
BT4	2	9	FLT	46.6
BT4	2	9	FWA	37.9
BT4	2	9	FWT	33.2
BT4	2	10	FLA	58.1
BT4	2	10	FLT	48.5
BT4	2	10	FWA	44.4
BT4	2	10	FWT	41.8
BT4	2	12A	FLA	48.3
BT4	2	12A	FLT	38.3
BT4	2	12A	FWA	35
BT4	2	12A	FWT	30.6
BT4	2	12B	FLA	40.9
BT4	2	12B	FLT	32.1
BT4	2	12B	FWA	39.1
BT4	2	12B	FWT	33.1
BT4	2	LEFT	FLA	54.2
BT4	2	LEFT	FLT	45.5
BT4	2	LEFT	FWA	45.5
BT4	2	LEFT	FWT	40.1
BT5	2	1	FLA	48.7
BT5	2	1	FLT	45.5
BT5	2	1	FWA	42.8
BT5	2	1	FWT	37.9
BT5	2	3	FLA	49.2
BT5	2	3	FLT	46.2
BT5	2	3	FWA	42.9
BT5	2	3	FWT	36.9
BT5	2	4	FLA	51.7
BT5	2	4	FLT	50.6
BT5	2	4	FWA	37.4
BT5	2	4	FWT	35.8
BT5	2	5	FLA	54.6
BT5	2	5	FLT	51
BT5	2	5	FWA	34.4
BT5	2	5	FWT	32.8
BT5	2	6	FLA	57.8
BT5	2	6	FLT	46.1
BT5	2	6	FWA	35.2
BT5	2	6	FWT	33.4
BT5	2	7	FLA	55.8
BT5	2	7	FLT	49.4
BT5	2	7	FWA	42.2
BT5	2	7	FWT	38.3
BT5	2	8	FLA	47.4
BT5	2	8	FLT	44
BT5	2	8	FWA	41.2
BT5	2	8	FWT	37.5
BT5	2	9	FLA	54.5
BT5	2	9	FLT	50.6
BT5	2	9	FWA	43.8
BT5	2	9	FWT	40
BT5	2	10	FLA	39.3
BT5	2	10	FLT	39.3
BT5	2	10	FWA	42.6
BT5	2	10	FWT	35.5
BT5	2	12	FLA	42.2
BT5	2	12	FLT	41.1
BT5	2	12	FWA	30.3
BT5	2	12	FWT	30
BT5	2	13	FLA	53
BT5	2	13	FLT	49.6
BT5	2	13	FWA	39.4
BT5	2	13	FWT	37.6
BT5	2	14	FLA	57.1
BT5	2	14	FLT	50.8
BT5	2	14	FWA	42
BT5	2	14	FWT	39.4
BT5	2	15	FLA	58.2
BT5	2	15	FLT	56.7
BT5	2	15	FWA	43.4
BT5	2	15	FWT	38
BT5	2	16	FLA	54.3
BT5	2	16	FLT	50.8
BT5	2	16	FWA	38.7
BT5	2	16	FWT	36.8
BT5	2	17	FLA	52.1
BT5	2	17	FLT	49.6
BT5	2	17	FWA	40.9
BT5	2	17	FWT	39.2
BT5	2	18	FLA	53
BT5	2	18	FLT	46.2
BT5	2	18	FWA	43.3
BT5	2	18	FWT	41.2
BT5	2	19	FLA	49
BT5	2	19	FLT	46.1
BT5	2	19	FWA	36.1
BT5	2	19	FWT	34.8
BT5	2	20	FLA	44.2
BT5	2	20	FLT	40
BT5	2	20	FWA	36.4
BT5	2	20	FWT	34.9
BT5	2	21	FLA	42.1
BT5	2	21	FLT	40.8
BT5	2	21	FWA	35.2
BT5	2	21	FWT	33.9
BT5	2	30	FLA	52.4
BT5	2	30	FLT	48.1
BT5	2	30	FWA	40.8
BT5	2	30	FWT	38.1
BT5	2	32	FLA	44.9
BT5	2	32	FLT	43.6
BT5	2	32	FWA	37.1
BT5	2	32	FWT	34.5
BT6	2	1	FLA	48.2
BT6	2	1	FLT	40.1
BT6	2	1	FWA	47.6
BT6	2	1	FWT	38.6
BT6	2	2	FLA	57
BT6	2	2	FLT	49.2
BT6	2	2	FWA	51.7
BT6	2	2	FWT	41.4
BT6	2	3	FLA	54.8
BT6	2	3	FLT	44.2
BT6	2	3	FWA	47.7
BT6	2	3	FWT	39.8
BT6	2	4	FLA	58.3
BT6	2	4	FLT	45.8
BT6	2	4	FWA	46.4
BT6	2	4	FWT	35.5
BT6	2	6	FLA	41.8
BT6	2	6	FLT	31.5
BT6	2	6	FWA	36.4
BT6	2	6	FWT	28.2
BT7	2	1	FLA	45.3
BT7	2	1	FLT	35.6
BT7	2	1	FWA	40
BT7	2	1	FWT	33.4
BT7	2	2	FLA	46.9
BT7	2	2	FLT	38.9
BT7	2	2	FWA	37.1
BT7	2	2	FWT	31.7
BT7	2	3	FLA	42.9
BT7	2	3	FLT	39.9
BT7	2	3	FWA	38.2
BT7	2	3	FWT	33
BT7	2	6	FLA	47.2
BT7	2	6	FLT	40.4
BT7	2	6	FWA	40.5
BT7	2	6	FWT	35.6
BT8	2	1	FLA	45.3
BT8	2	1	FLT	43.5
BT8	2	1	FWA	43.6
BT8	2	1	FWT	40.2
BT8	2	2	FLA	50.1
BT8	2	2	FLT	45
BT8	2	2	FWA	37
BT8	2	2	FWT	35.1
BT8	2	8	FLA	55.2
BT8	2	8	FLT	54.7
BT8	2	8	FWA	53.6
BT8	2	8	FWT	51.3
